# Supplementary material for: Assessment of Progression-Free Survival as a Surrogate End Point of Overall Survival in First-Line Treatment of Ovarian Cancer: A Systematic Review and Meta-analysis
Source: PubMed Central journal article supplement (PMC6991254; doi:10.1001/jamanetworkopen.2019.18939), 2020-01-10
Supplement: jamanetwopen-3-e1918939-s001.pdf [file jamanetwopen-3-e1918939-s001.pdf]

## Supplementary Online Content

Paoletti X, Lewsley L-A, Daniele G, et al; Gynecological Cancer InterGroup (GCIg) Meta-analysis Committee. Assessment of progression-free survival as a surrogate end point of overall survival in first-line treatment of ovarian cancer: a systematic review and meta-analysis. *JAMA Netw Open*. 2020;3(1):e1918939. doi:10.1001/jamanetworkopen.2019.18939

**eFigure 1.** PRISMA Flow Diagram

**eFigure 2.** Overall Survival (A) and Progression Free Survival (B)

**eFigure 3.** Overall Survival (OS) in Each Trial According to the Year of Trial's Initiation

**eFigure 4.** Overall and Trial by Trial Treatment Effect (HR) on Overall and Progression-Free Survival

**eFigure 5.** Re-estimating the Relationship Between the Hazard Ratio (HR) on OS and HR(PFS) by Leaving One Trial Out at a Time

**eTable 1.** Risk of Bias Summary: Authors' Judgments About Each Risk of Bias Item for Each Included Study

**eTable 2.** Patients' Characteristics

**eTable 3.** Observed and Predicted Treatment Effect on Overall Survival (OS HR), Based on the Observed Treatment Effect on Progression-Free Survival (PFS HR)

This supplementary material has been provided by the authors to give readers additional information about their work.

eFigure 1. PRISMA Flow Diagram

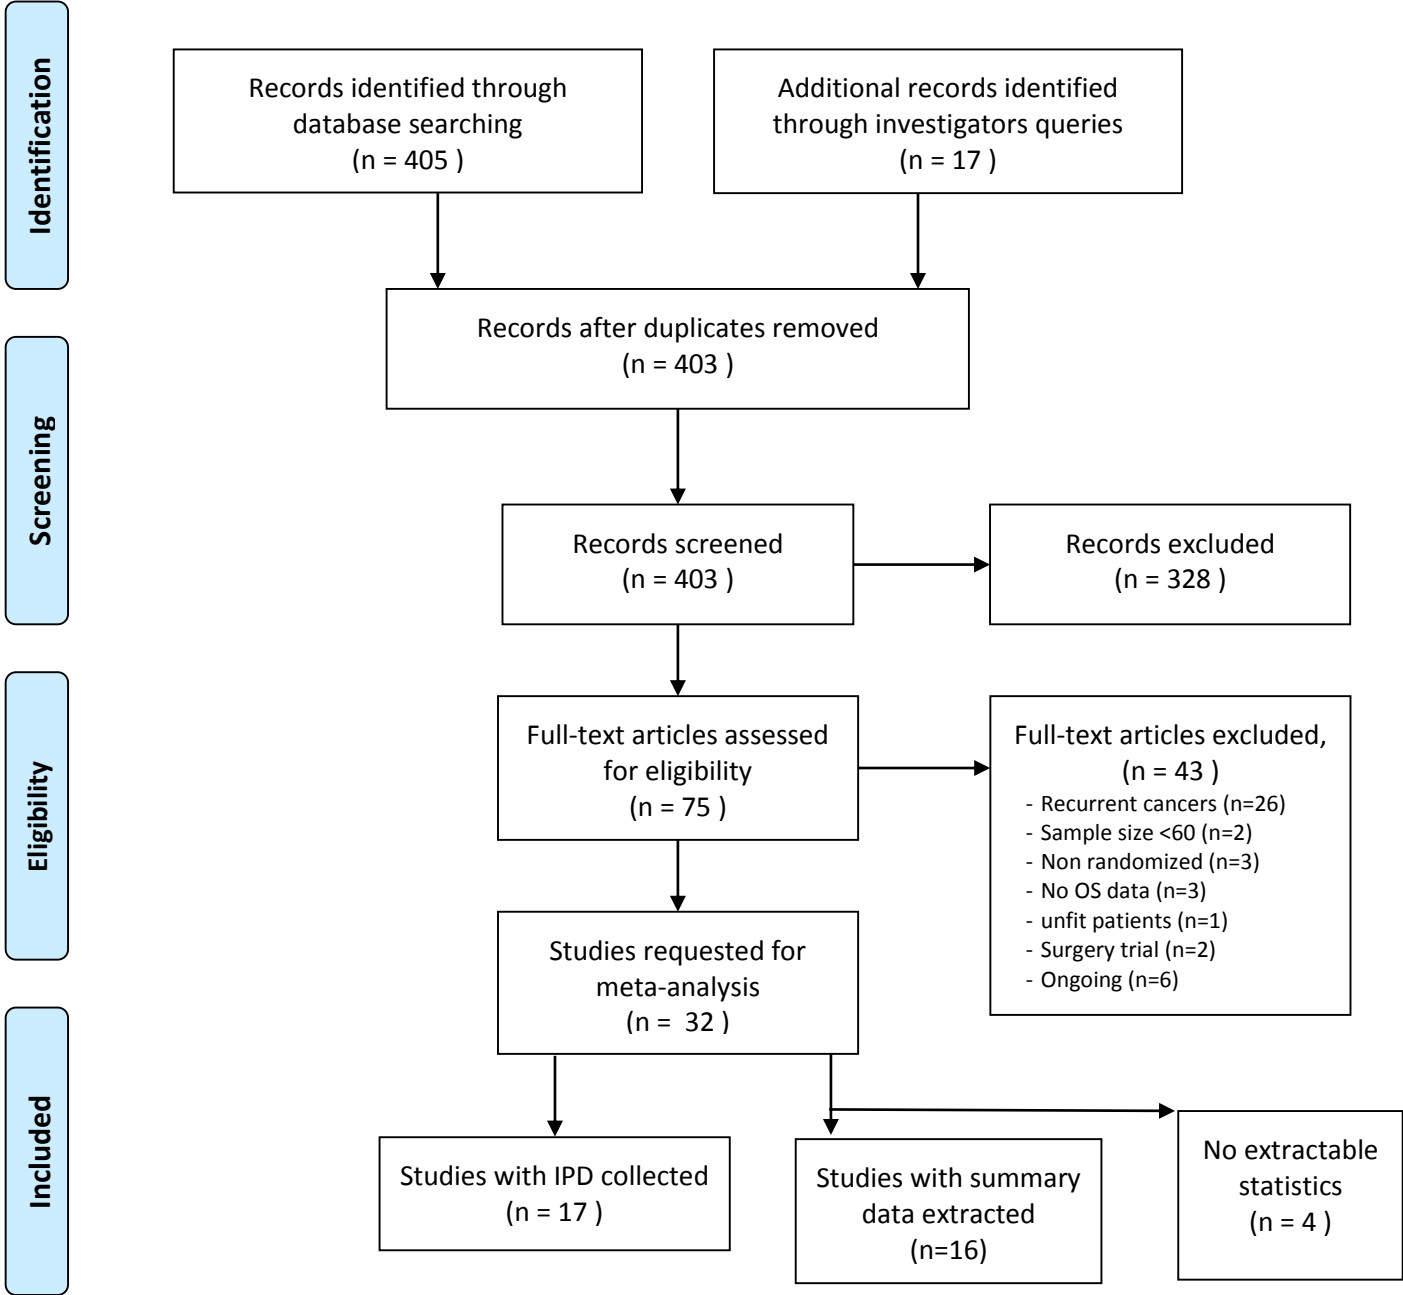

eFigure 2. Overall Survival (A) and Progression Free Survival (B)

- Peto Curve truncated at 8 years. Person-years are provided, which may be inferior to the number of patients at risk due to patients having event or being censored during the considered year.

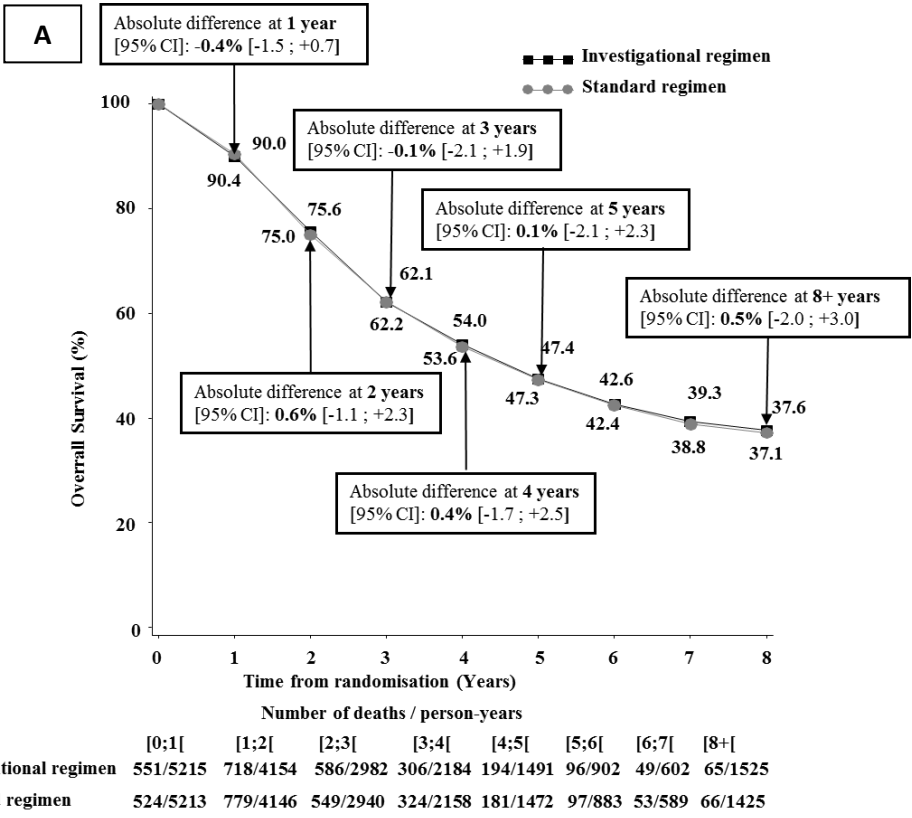

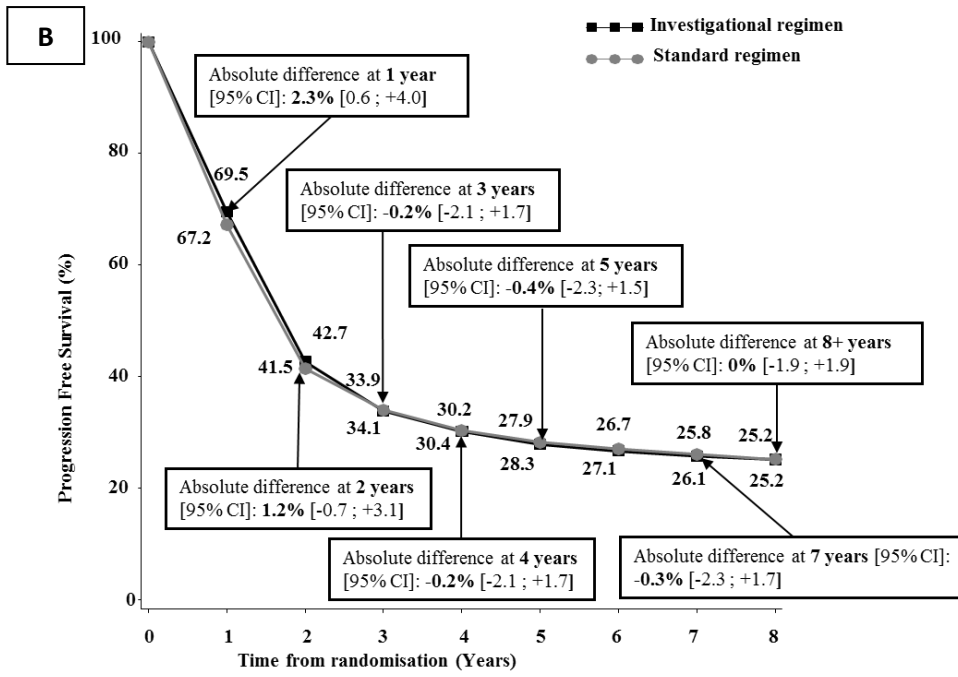

| Years                   | Number of progression events / person-years |           |          |          |        |        |        |         |
|-------------------------|---------------------------------------------|-----------|----------|----------|--------|--------|--------|---------|
|                         | [0;1[                                       | [1;2[     | [2;3[    | [3;4[    | [4;5[  | [5;6[  | [6;7[  | [8+]    |
| Investigational regimen | 1725/4762                                   | 1335/2731 | 388/1676 | 143/1215 | 66/866 | 26/577 | 13/408 | 32/1240 |
| Standard regimen        | 1868/4682                                   | 1244/2587 | 319/1641 | 139/1211 | 61/867 | 24/555 | 16/396 | 37/1124 |

eFigure 3. Overall Survival (OS) in Each Trial According to the Year of Trial's Initiation

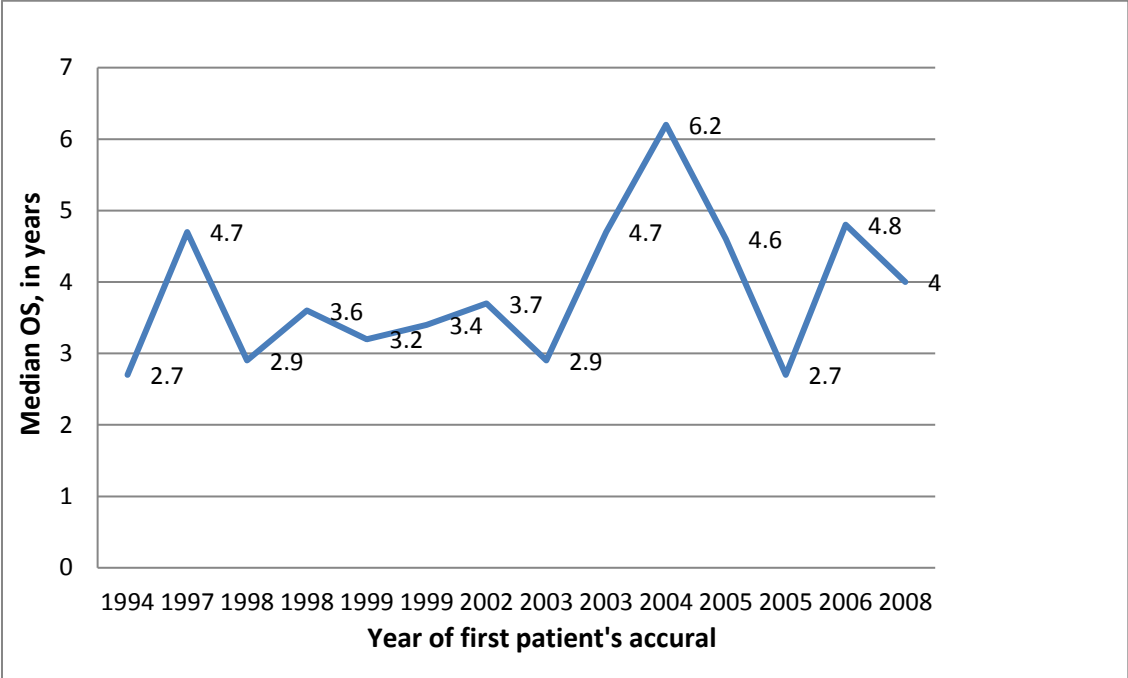

eFigure 4. Overall and Trial by Trial Treatment Effect (HR) on Overall and Progression-Free Survival

A, Overall and trial by trial treatment effect (HR) on overall Survival

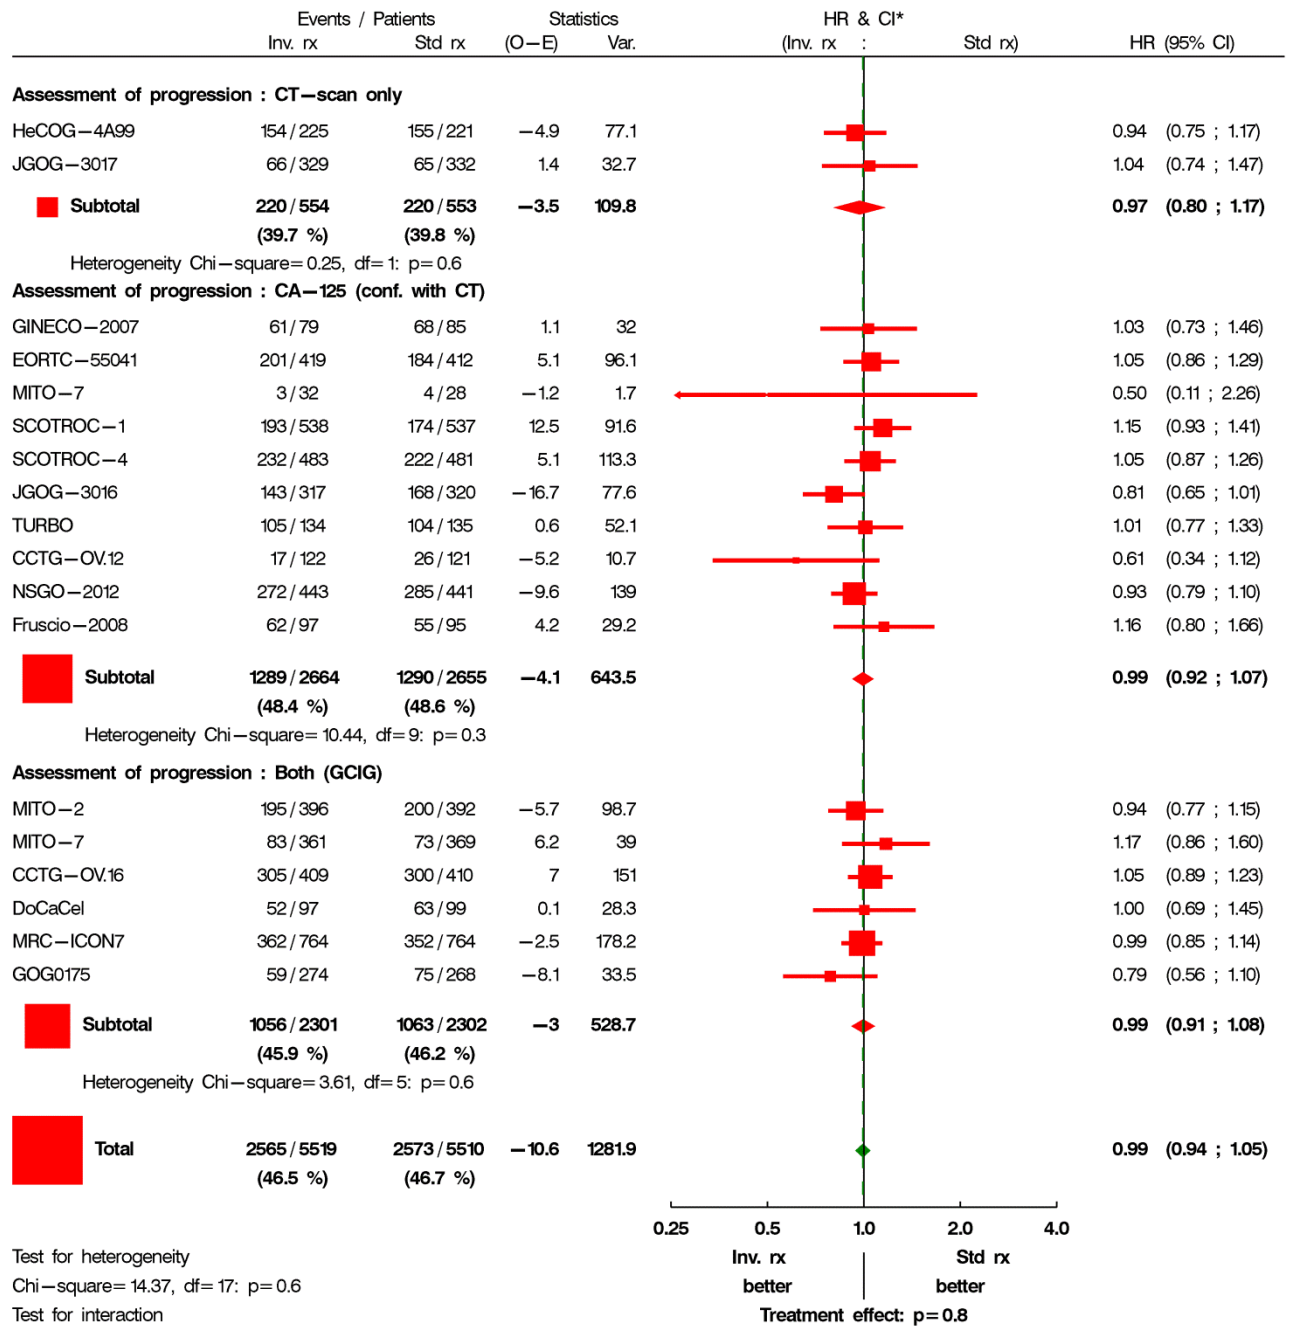

B, Overall and trial by trial treatment effect (HR) on progression free survival

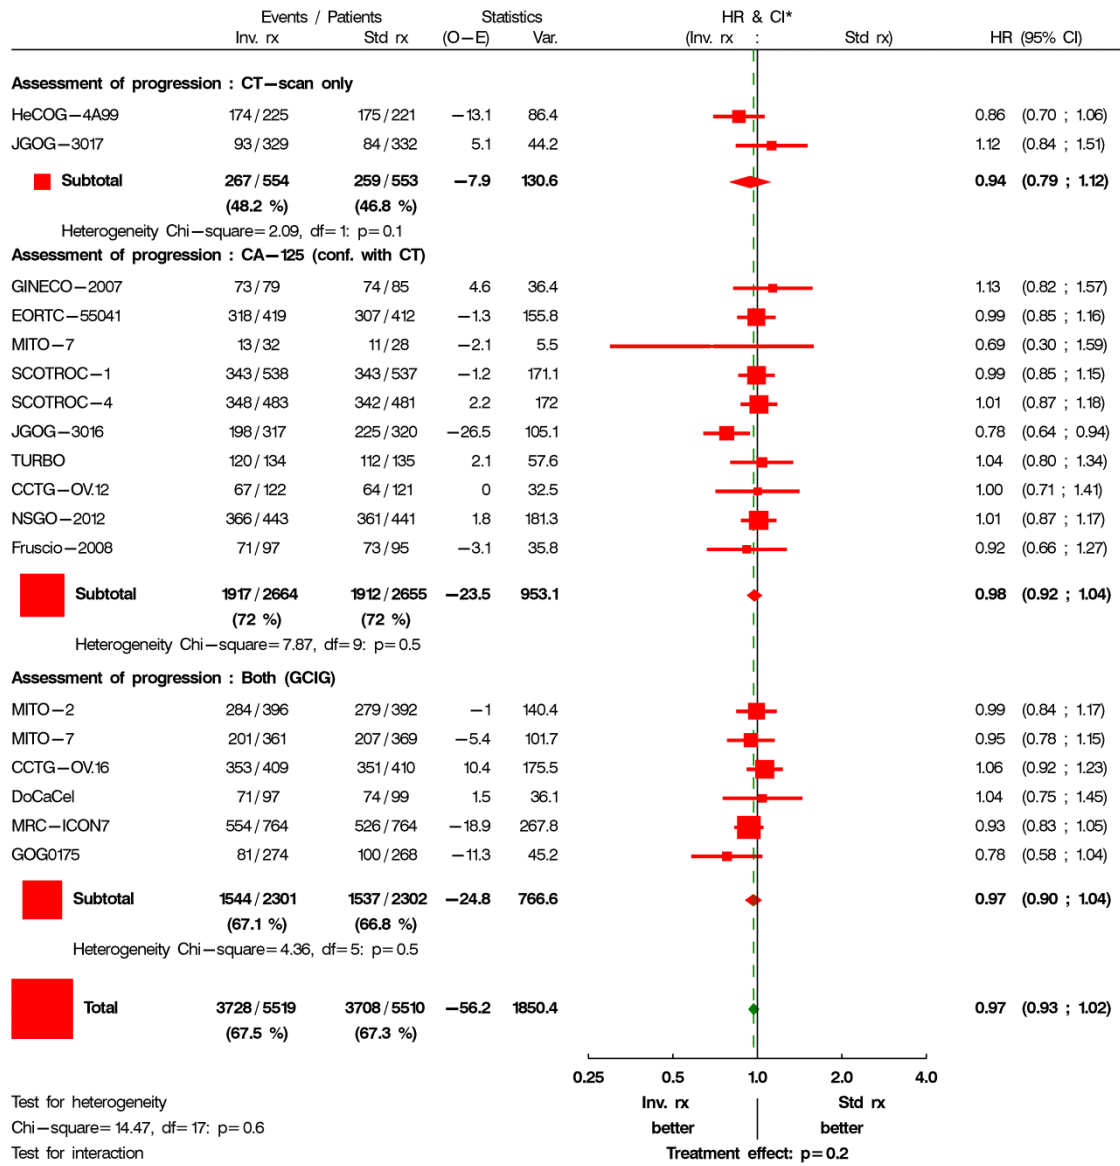

MITO-7 appears twice as part of the patients had systematic CT-scans as per the GCIG criteria while others had CT-scans in the case of CA125 biomarker raise.

eFigure 5. Re-estimating the Relationship Between the Hazard Ratio (HR) on OS and HR(PFS) by Leaving One Trial Out at a Time

For each labeled trial, the full Clayton copula model was estimated by excluding the labeled trial. The squares and circles indicate the HR(OS) predicted from the HR(PFS) and the observed HR(OS) estimates. The solid bars are the 95% confidence intervals (CIs). The red circle corresponds to the OV-12 trial (tanomastat as maintenance therapy that was interrupted by Bayer due to negative results in pancreatic and NSCL cancers) was the only observation outside of the predicted interval. Exclusion of the OV-12 trial gave a better correlation ( $R^2=0.66$ ,  $95\%CI=0.40, 0.93$ ), yet insufficient to validate surrogacy.

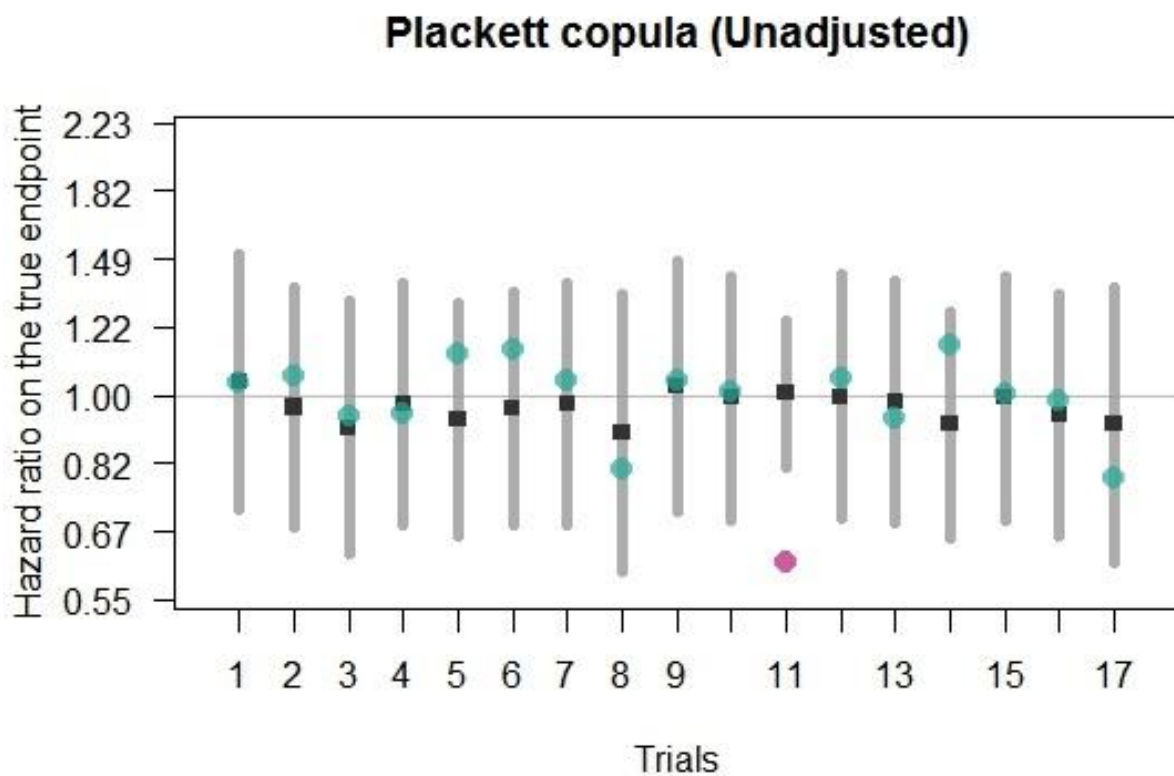

| Excl. Trial           | 1   | 2    | 3    | 4    | 5    | 6    | 7    | 8    | 9    | 10   | 11   | 12   | 13   | 14   | 15   | 16   | 17   |
|-----------------------|-----|------|------|------|------|------|------|------|------|------|------|------|------|------|------|------|------|
| $R^2_{\text{copula}}$ | 0.2 | 0.23 | 0.23 | 0.23 | 0.27 | 0.23 | 0.23 | 0.14 | 0.22 | 0.18 | 0.66 | 0.23 | 0.24 | 0.26 | 0.23 | 0.24 | 0.18 |

Excl. stands for excluded.



**eTable 1. Risk of Bias Summary: Authors' Judgments About Each Risk of Bias Item for Each Included Study**

| Items        | Random sequence generation (selection bias) | Allocation concealment (selection bias) | Follow-up quality (Kaplan-Meier inverse d) | Blinding of participants and personnel (performance bias) | Blinding of outcome assessment (detection bias) for OS / PFS | Incomplete outcome data (attrition bias) | Other bias |
|--------------|---------------------------------------------|-----------------------------------------|--------------------------------------------|-----------------------------------------------------------|--------------------------------------------------------------|------------------------------------------|------------|
| EORTC-55041  | -                                           | -                                       | -                                          | +                                                         | -/+                                                          | -                                        |            |
| CCTG-OV.12   | -                                           | -                                       | -                                          | -                                                         | -/+                                                          | -                                        |            |
| DoCaCel      | -                                           | ?                                       | -                                          | +                                                         | -/+                                                          | -                                        |            |
| MRC-ICON7    | -                                           | -                                       | -                                          | +                                                         | -/+                                                          | -                                        |            |
| GOG-0175     | -                                           | -                                       | -                                          | +                                                         | -/+                                                          | -                                        |            |
| HECOG-4A99   | -                                           | -                                       | -                                          | +                                                         | -/+                                                          | -                                        |            |
| MITO-2       | -                                           | -                                       | -                                          | -                                                         | -/-                                                          | -                                        |            |
| SCOTROC-1    | -                                           | -                                       | -                                          | +                                                         | -/+                                                          | -                                        |            |
| JGOG-3017    | -                                           | -                                       | -                                          | +                                                         | -/+                                                          | -                                        |            |
| CCTG-OV.16   | -                                           | -                                       | -                                          | +                                                         | -/+                                                          | -                                        |            |
| NSGO-2012    | -                                           | -                                       | -                                          | +                                                         | -/+                                                          | -                                        |            |
| Fruscio-2008 | -                                           | ?                                       | -                                          | +                                                         | -/+                                                          | -                                        |            |
| GINECO-2007  | -                                           | -                                       | -                                          | +                                                         | -/+                                                          | -                                        |            |
| MITO-7       | -                                           | -                                       | -                                          | +                                                         | -/+                                                          | -                                        |            |
| SCOTROC-4    | -                                           | -                                       | -                                          | +                                                         | -/+                                                          | -                                        |            |
| JGOG-3016    | -                                           | -                                       | -                                          | +                                                         | -/+                                                          | -                                        |            |
| TURBO        | -                                           | -                                       | -                                          | +                                                         | -/+                                                          | -                                        |            |

Each domain was judged as 'low risk of bias' (-), 'high risk of bias' (+), or 'unclear risk of bias' (?) in each study according to the Cochrane Handbook for Systematic Reviews of Interventions (Higgins JPT, Green S. Cochrane Handbook for Systematic Reviews of Interventions. The Cochrane Collaboration; 2011)

| eTable 2. Patients' Characteristics |                  |                 |       |                  |       |                         |       |
|-------------------------------------|------------------|-----------------|-------|------------------|-------|-------------------------|-------|
| Variable                            |                  | Total           |       | Standard regimen |       | Investigational regimen |       |
| Age                                 | n (m.d.)         | 11027           |       | 5509             |       | 5518 (1)                |       |
|                                     | Mean (sd)        | 57.8<br>(10.8)  |       | 57.9<br>(10.8)   |       | 57.7<br>(10.9)          |       |
|                                     | Median (Q1 ; Q3) | 58 (50 ;<br>66) |       | 58 (50<br>; 66)  |       | 58 (50 ;<br>66)         |       |
|                                     | Min ; Max        | 18 ; 88         |       | 18 ;<br>87       |       | 19 ; 88                 |       |
|                                     |                  |                 |       |                  |       |                         |       |
| Performance status                  | n (m.d.)         | 10964           |       | 5480             |       | 5484                    |       |
|                                     | 0                | 5990            | 54.6% | 2994             | 54.6% | 2996                    | 54.6% |
|                                     | 1                | 4305            | 39.3% | 2168             | 39.6% | 2137                    | 39.0% |
|                                     | 2+               | 629             | 5.7%  | 296              | 5.4%  | 333                     | 6.1%  |
|                                     | 3                | 40              | 0.4%  | 22               | 0.4%  | 18                      | 0.3%  |
|                                     |                  |                 |       |                  |       |                         |       |
| Figo                                | n (m.d.)         | 11013           |       | 5500             |       | 5513 (6)                |       |
|                                     | Stage I(a&b)     | 297             | 2.7%  | 144              | 2.6%  | 153                     | 2.8%  |
|                                     | Stage Ic         | 1049            | 9.5%  | 533              | 9.7%  | 516                     | 9.4%  |
|                                     | Stage II(a&b)    | 669             | 6.1%  | 331              | 6.0%  | 338                     | 6.1%  |
|                                     | Stage IIc        | 501             | 4.6%  | 242              | 4.4%  | 259                     | 4.7%  |
|                                     | Stage III(a&b&c) | 6689            | 60.7% | 3366             | 61.2% | 3323                    | 60.3% |
|                                     | Stage IV(a&b)    | 1808            | 16.4% | 884              | 16.0% | 924                     | 16.7% |
|                                     |                  |                 |       |                  |       |                         |       |

|                          |                         |                |       |                |       |                |       |
|--------------------------|-------------------------|----------------|-------|----------------|-------|----------------|-------|
| Histological subtype     | n (m.d.)                | 10892<br>(137) |       | 5436<br>(74)   |       | 5456<br>(63)   |       |
|                          | Serous carcinoma        | 6076           | 55.8% | 3041           | 55.9% | 3035           | 55.6% |
|                          | Endometrioid            | 1050           | 9.6%  | 516            | 9.5%  | 534            | 9.8%  |
|                          | Mucinous                | 308            | 2.8%  | 146            | 2.7%  | 162            | 3.0%  |
|                          | Clear cell              | 1358           | 12.5% | 676            | 12.4% | 682            | 12.5% |
|                          | Other                   | 1513           | 13.9% | 778            | 14.3% | 735            | 13.5% |
|                          | Undifferentiated        | 127            | 1.2%  | 63             | 1.2%  | 64             | 1.2%  |
|                          | Unknown                 | 460            | 4.2%  | 216            | 4.0%  | 244            | 4.5%  |
|                          |                         |                |       |                |       |                |       |
| Histological grade       | n (m.d.)                | 10644<br>(385) |       | 5314<br>(196)  |       | 5330<br>(189)  |       |
|                          | Well differentiated     | 842            | 7.9%  | 432            | 8.1%  | 410            | 7.7%  |
|                          | Moderate differentiated | 2206           | 20.7% | 1091           | 20.5% | 1115           | 20.9% |
|                          | Poorly/Undifferentiated | 5951           | 55.9% | 2989           | 56.2% | 2962           | 55.6% |
|                          | Unknown                 | 1645           | 15.5% | 802            | 15.1% | 843            | 15.8% |
|                          |                         |                |       |                |       |                |       |
| Surgical procedure       | n (m.d.)                | 8609<br>(2420) |       | 4304<br>(1206) |       | 4305<br>(1214) |       |
|                          | Primary resection       | 7567           | 87.2% | 3794           | 88.2% | 3773           | 87.6% |
|                          | Delayed surgery         | 343            | 4.0%  | 159            | 3.7%  | 184            | 4.3%  |
|                          | No surgery              | 699            | 8.1%  | 351            | 8.1%  | 348            | 8.1%  |
|                          |                         |                |       |                |       |                |       |
| Maximal residual disease | n (m.d.)                | 9085<br>(1944) |       | 4540<br>(970)  |       | 4545<br>(974)  |       |
|                          | <1cm                    | 5154           | 56.7% | 2571           | 56.7% | 2583           | 56.8% |
|                          | >=1cm                   | 3931           | 46.3% | 1969           | 43.3% | 1962           | 43.2% |
|                          |                         |                |       |                |       |                |       |

|                           |                                       |       |       |      |       |      |       |
|---------------------------|---------------------------------------|-------|-------|------|-------|------|-------|
| Assessment of progression | n                                     | 11029 |       | 5510 |       | 5519 |       |
|                           | CT-scan                               | 1107  | 10.0% | 553  | 10.0% | 554  | 10.0% |
|                           | CA-125-Clinical(confirmation with CT) | 5319  | 48.2% | 2655 | 48.2% | 2664 | 48.3% |
|                           | Both                                  | 4603  | 41.7% | 2302 | 41.8% | 2301 | 41.7% |
|                           |                                       |       |       |      |       |      |       |

eTable 3. Observed and Predicted Treatment Effect on Overall Survival (OS HR), Based on the Observed Treatment Effect on Progression-Free Survival (PFS HR)

| Trial label | Validation Trials (references) | Initial (I) vs maintenance (M) | Observed PFS HR (95% CI) | Observed OS HR (95% CI) | Predicted OS HR (95% PI) |
|-------------|--------------------------------|--------------------------------|--------------------------|-------------------------|--------------------------|
| 1           | GOG-0218 [37]                  | I                              | 0.91 (0.8, 1.04)         | 1.04 (0.83, 1.3)        | 0.96 (0.81, 1.12)        |
| 2           | Gineco-TCG/OVAR-9 [38]         | I                              | 1.18 (1.06, 1.32)        | 1.05 (0.91, 1.19)       | 1.15 (0.96, 1.31)        |
| 3           | Bolis-2010 [39]                | I                              | 0.98 (0.71, 1.36)        | 0.85 (0.56, 1.29)       | 1.01 (0.78, 1.27)        |
| 4           | GOG0182-ICON5 [40]             | I                              | 1.01 (0.89, 1.14)        | 1.03 (0.94, 1.14)       | 1.03 (0.94, 1.10)        |
| 5           | Valspodar-2008 [41]            | I                              | 0.96 (0.8, 1.15)         | 0.99 (0.83,1.19)        | 1 (0.84, 1.15)           |
| 6           | AGO-OVAR-5 [42]                | I                              | 0.95 (0.83, 1.07)        | 0.93 (0.81, 1.08)       | 0.99 (0.86, 1.11)        |
| 7           | AGO-OVAR16 [43]                | M                              | 0.77 (0.64, 0.91)        | 1.08 (0.87, 1.33)       | 0.86 (0.69, 1.07)        |
| 8           | Herzog-2013 [44]               | M                              | 1.09 (0.72, 1.63)        | 1.49 (0.69, 3.23)       | 1.09 (0.62, 1.24)        |
| 9           | Vergote-2013 [45]              | M                              | 0.80 (0.5, 1.29)         | 0.83 (0.52, 1.35)       | 0.88 (0.62, 1.24)        |
| 10          | AGO-OVAR-15 [46]               | M                              | 0.78 (0.5, 1.22)         | 0.62 (0.36, 1.06)       | 0.87 (0.54, 1.37)        |
| 11          | After-6 Protocol 1 [47]        | M                              | 0.98 (0.67, 1.44)        | 0.88 (0.50, 1.55)       | 1.01 (0.62, 1.61)        |
| 12          | AGO- GINECO TEC-TC [48]        | I                              | 0.97 (0.85, 1.1)         | 1.01 (0.99, 1.52)       | 1 (0.86, 1.14)           |
| 13          | SWOG-9701/GOG-178 [49]         | M                              | 0.68 (0.52, 0.88)        | 0.88 (0.75, 1.32)       | 0.79 (0.58, 1.09)        |
| 14          | Gordon-2011 [50]               | M                              | 1.11 (0.94, 1.31)        | 1.22 (0.99, 1.52)       | 1.1 (0.1, 1.28)          |
| 15          | AGO-OVAR-12 [51]               | I                              | 0.84 (0.72, 0.98)        | 0.99 (0.83, 1.17)       | 0.91 (0.76, 1.07)        |
| 16          | MIMOSA [52]                    | M                              | 1.1 (0.92, 1.32)         | 1.15 (0.72, 1.52)       | 1.09 (0.86, 1.34)        |

HR= hazard ratio; PFS = progression free survival; OS= overall survival; CI = confidence interval; PI = prediction interval
